# Supplementary material for: Genetic Testing in Hereditary Breast and Ovarian Cancer Using Massive Parallel Sequencing
Source: Hindawi journal article supplement (doi:10.1155/2014/542541), 2014-01-01
Supplement: f1 [file 542541.f1.pdf]

Supplementary Table 1. Frequency variant detection by the AVA 2.7 software.

| Variant HGVS              | Gene  | Pathogenicity | Variant freq (n° of reads; MID) |               | Variant freq (n° of reads; MID ) |              | Variant freq (n° of reads; MID ) |              |
|---------------------------|-------|---------------|---------------------------------|---------------|----------------------------------|--------------|----------------------------------|--------------|
|                           |       |               | Run1                            |               | Run2                             |              | Run3                             |              |
|                           |       |               | forward                         | reverse       | forward                          | reverse      | forward                          | reverse      |
| c.1-134C>T                | BRCA1 | POL           | 62.16 (37;2)                    | 46.34(41;2)   | 100 (68;1)                       | 100 (59;1)   | 56.67(159;5)                     | 48.94(94;5)  |
| c.70_71insTGTC            | BRCA1 | PATH          | Not present                     |               | 55.88(68;1)                      | 59.32(59;1)  | Not present                      |              |
| c.442-34C>T               | BRCA1 | POL           | 58.82(34;8)                     | 62.86(35;8)   | 51.72(29;4)                      | 70.27(37;4)  | 60.98(82;6)                      | 44.23(52;6)  |
| c.548-58delT <sup>a</sup> | BRCA1 | POL           | 100(67;1)                       | 90,74(108;1)  | 35(40;2)                         | 76,36(55;2)  | 70,37(27;4)                      | 95,35(43;4)  |
| c.591C>T                  | BRCA1 | POL           | 56.52(23;2)                     | 43.75(32;2)   | Not present                      |              | 53.57(28;1)                      | 41.67(12;1)  |
| c.1121-1123delCACinsT     | BRCA1 | PATH          | 35 (60;8)                       | 49.25 (67;8)  | Not present                      |              | Not present                      |              |
| c.1961delA <sup>a</sup>   | BRCA1 | PATH          | 38.68(106;6)                    | 31.07(103;6)  | Not present                      |              | Not present                      |              |
| c.2077G>A                 | BRCA1 | POL           | 43.33(90;6)                     | 44.23(104;6)  | Not present                      |              | Not present                      |              |
| c.2082C>T                 | BRCA1 | POL           | 52.33(86;8)                     | 54.81(104;6)  | 100 (45;1)                       | 100 (51;1)   | 100.00(47;2)                     | 100.00(48;2) |
| c.2311 T>C                | BRCA1 | POL           | 34.02(97;8)                     | 46.25(80;8)   | 100 (82;1)                       | 100 (108;1)  | 49.35(154;3)                     | 51.20(166;3) |
| c.2612C>T                 | BRCA1 | POL           | 99.00(100;4)                    | 98.75(80;4)   | 98,29 (117;1)                    | 100 (138;1)  | 60.71(112;4)                     | 52.14(117;4) |
| c.2634A>G                 | BRCA1 | POL           | Not present                     |               | Not present                      |              | 45.24(126;8)                     | 53.79(132;8) |
| c.2921T>A (p.L974X)       | BRCA1 | PATH          | Not present                     |               | 51.16 (43;2)                     | 36.21(58;2)  | Not present                      |              |
| c.3113A>G                 | BRCA1 | POL           | 99.15(117;6)                    | 99.06(106;6)  | 47.92(48;6)                      | 55.84(77;4)  | 48.70(154;7)                     | 50.00(170;7) |
| c.3119G>A                 | BRCA1 | POL           | Not present                     |               | 54.17(24;6)                      | 47.62(42;6)  | 48.84(43;4)                      | 59.57(47;4)  |
| c.3548A>G                 | BRCA1 | POL           | 52.14(117;2)                    | 47.06(102;2)  | 100.00(73;5)                     | 100.00(86;5) | 41.46(82;3)                      | 68.00(75;3)  |
| c.3767_3768delCA          | BRCA1 | PATH          | Not present                     |               | Not present                      |              | 26 (50;3)                        | 54.69 (64;3) |
| c.3770-3771delAG          | BRCA1 | PATH          | 50 (50;4)                       | 47.46 (59;4)  | Not present                      |              | Not present                      |              |
| c.4097-141A>C             | BRCA1 | POL           | Not present                     |               | 50.54(93;7)                      | 50.00(88;7)  | 44.97(149;3)                     | 47.53(162;3) |
| c.4107-4110dupATCT        | BRCA1 | PATH          | 54.24(59;5)                     | 51.85(54;5)   | Not present                      |              | Not present                      |              |
| c.4113G>A                 | BRCA1 | POL           | Not present                     |               | Not present                      |              | 51.61(155;4)                     | 53.42(146;4) |
| c.4308T>C                 | BRCA1 | POL           | 100.00 (97;6)                   | 100.00(130;6) | 50.00(32;8)                      | 48.94(47;8)  | 100.00(67;2)                     | 100.00(52;2) |
| c.4485-63C>G              | BRCA1 | POL           | Not present                     |               | 38.46(78;7)                      | 50.00(102;7) | 41.67(48;1)                      | 43.75(48;1)  |
| c.4837A>G                 | BRCA1 | POL           | 48.48(66;2)                     | 52.83(53;2)   | 51.85(162;4)                     | 51.11(180;4) | 47.89(71;3)                      | 38.64(88;3)  |
| c.4987-68A>G              | BRCA1 | POL           | Not present                     |               | 48.89(90;4)                      | 51.22(123;4) | 52.00(75;5)                      | 49.40(83;5)  |
| c.4987-92A>G              | BRCA1 | POL           | Not present                     |               | 48.89(90;4)                      | 51.22(123;4) | 52.00(75;5)                      | 50.60(83;5)  |
| c.5074+6C>G               | BRCA1 | VUS           | Not present                     |               | 49.49(99;5)                      | 49.63(135;5) | Not present                      |              |
| c.5123C>A                 | BRCA1 | PATH          | 52.38(42;2)                     | 56.25(48)     | Not present                      |              | 50.00(58;1)                      | 33.93(56;1)  |
| c.5152+66G>A              | BRCA1 | POL           | 45.24(42;2)                     | 41.67(48;2)   | 25.00(12;6)                      | 50.00(32;6)  | 52.94 (102;6)                    | 64.37 (87;6) |
| c.5467+9C>A               | BRCA1 | VUS           | 58.70(46;4)                     | 43.48(46;4)   | Not present                      |              | Not present                      |              |

|                         |       |      |               |              |              |              |              |              |
|-------------------------|-------|------|---------------|--------------|--------------|--------------|--------------|--------------|
| c.1-26G>A               | BRCA2 | POL  | 49.30(71;7)   | 51.28(78;7)  | 53.03(66;8)  | 38.46(52;8)  | 44.44(54;4)  | 42.86(56;4)  |
| c.425+67A>C             | BRCA2 | POL  | Not present   |              | Not present  |              | 54.39(57;8)  | 53.85(52;8)  |
| c.426-89T>C             | BRCA2 | POL  | Not present   |              | Not present  |              | 49.18(61;8)  | 45.07(71;8)  |
| c.631+183T>A            | BRCA2 | POL  | Not present   |              | 60.53(38;3)  | 57.14(14;3)  | 49.18(61;1)  | 42.31(52;1)  |
| c.681+56C>T             | BRCA2 | POL  | Not present   |              | 52.08(48;1)  | 40.43(47;1)  | 34.21(38;5)  | 52.38(42;5)  |
| c.865A>C                | BRCA2 | POL  | Not present   |              | Not present  |              | 44.12(34;1)  | 60.53(38;1)  |
| c.1114A>C               | BRCA2 | POL  | 45.45(22;7)   | 36.84(19;7)  | 59.52 (42;1) | 76.47 (17;1) | 38.24(34;2)  | 45.16(31;2)  |
| c.1365A>G               | BRCA2 | POL  | Not present   |              | Not present  |              | 42.11(38;1)  | 62.07(58;1)  |
| c.1842dupT              | BRCA2 | PATH | Not present   |              | Not present  |              | 56.00(25;5)  | 55.17(29;5)  |
| c.2229T>C               | BRCA2 | POL  | Not present   |              | Not present  |              | 39.13(23;1)  | 42.42(33;1)  |
| c.2803G>A               | BRCA2 | POL  | 54.61(141;7)  | 56.13(155;7) | Not present  |              | Not present  |              |
| c.2971A>G               | BRCA2 | POL  | Not present   |              | Not present  |              | 54.26(94;1)  | 563.22(87;1) |
| c.3170A>G               | BRCA2 | POL  | Not present   |              | Not present  |              | 53.61(166;7) | 52.71(203;7) |
| c.3396A>G               | BRCA2 | POL  | 63.33(30;7)   | 57.14(35;7)  | 51.22(82;3)  | 44.32(88;3)  | 100.00(69;4) | 100.00(94;4) |
| c.3807T>C               | BRCA2 | POL  | 100.00(80;6)  | 97.44(78;6)  | 45.00(60;5)  | 46.67(45;5)  | 51.69(89;3)  | 33.78(74;3)  |
| c. 5350-5351delAAinsT   | BRCA2 | PATH | 48.92 (139;7) | 54.08 (98;7) | Not present  |              | Not present  |              |
| c.5640T>G               | BRCA2 | POL  | Not present   |              | Not present  |              | 49.02(51;3)  | 47.3(74;3)   |
| c.6275-6276delTT        | BRCA2 | PATH | 47.41(116;1)  | 38.13(139;1) | Not present  |              | Not present  |              |
| c.6841+79delTTAA        | BRCA2 | POL  | 99.06(106;5)  | 98,08(104;5) | 63.21(49;3)  | 41.94(31;3)  | 100(31;4)    | 100(24;4)    |
| c.7008-62A>G            | BRCA2 | POL  | 36.11(36;7)   | 36.11(36;7)  | Not present  |              | Not present  |              |
| c.7150C>A               | BRCA2 | POL  | Not present   |              | Not present  |              | 49.02(51;3)  | 47.30(74;3)  |
| c.7242A>G               | BRCA2 | POL  | 54.72(106;1)  | 56.38(94;1)  | Not present  |              | 45.71(105;6) | 51.18(127;6) |
| c.7617+1G>A             | BRCA2 | PATH | Not present   |              | Not present  |              | 34,78(23)    | 48.28(29)    |
| c.7806-14T>C            | BRCA2 | POL  | 48.57(35;1)   | 50.00(40;1)  | 44.44(54;4)  | 60.00(45;4)  | 100.00(56;5) | 100.00(35;5) |
| c.8149G>T               | BRCA2 | POL  | Not present   |              | 52.94(34;8)  | 29.03(31;8)  | Not present  |              |
| c.8755-66T>C            | BRCA2 | POL  | Not present   |              | 43.59(39;4)  | 60.00(32;4)  | 100,00(28;5) | 100,00(28;5) |
| c.8851G>A               | BRCA2 | POL  | Not present   |              | Not present  |              | 48.48(66;8)  | 56.36(55;8)  |
| c.8946delA <sup>a</sup> | BRCA2 | PATH | Not present   |              | Not present  |              | 100 (52;6)   | 44.44(36;6)  |
| c.9026_9030delATCAT     | BRCA2 | PATH | Not present   |              | Not present  |              | 50.94 (53;2) | 40.54 (37;2) |
| c.9257-16T>C            | BRCA2 | POL  | 62.79(43;1)   | 45.00(40;1)  | Not present  |              | Not present  |              |
| c.9976A>T               | BRCA2 | POL  | 30.43(23;1)   | 40.74(27;1)  | Not present  |              | Not present  |              |
| c.10362A>C              | BRCA2 | POL  | Not present   |              | 64.00(25;7)  | 58.54(41;7)  | 58.33(24;7)  | 39.20(28;7)  |

<sup>a</sup> variants located in homopolimeric regions

Supplementary Table 2. False positives detected by the AVA2.7 software.

| Type of variant  | Gene  | Homopolimeric region | Sequence homopolymer | Run      | Location  |
|------------------|-------|----------------------|----------------------|----------|-----------|
| c.81-18delC      | BRCA1 | Yes                  | 6C                   | Run2/3   | Intron 2  |
| c.302-138delA    | BRCA1 | Yes                  | 8A                   | Run2/3   | Intron 6  |
| c.329delA        | BRCA1 | Yes                  | 6A                   | Run3     | Exon 7    |
| c.441+40delT     | BRCA1 | Yes                  | 4T                   | Run2/3   | Intron 7  |
| c.441+50_51delTT | BRCA1 | Yes                  | 10T                  | Run2     | Intron 7  |
| c.441+51del14    | BRCA1 | Yes                  | 10T                  | Run2/3   | Intron 7  |
| c.441+51delT     | BRCA1 | Yes                  | 10T                  | Run2     | Intron 7  |
| c.441+63_64delTT | BRCA1 | Yes                  | 12T                  | Run2     | Intron 7  |
| c.441+64del4     | BRCA1 | Yes                  | 12T                  | Run2     | Intron 7  |
| c.441+64del      | BRCA1 | Yes                  | 12T                  | Run2/3   | Intron 7  |
| c.548-58delTT    | BRCA1 | Yes                  | 7T                   | Run2     | Intron 8  |
| c.548-58delT     | BRCA1 | Yes                  | 7T                   | Run1/2/3 | Intron 8  |
| c.548-49delT     | BRCA1 | Yes                  | 4T                   | Run2/3   | Intron 8  |
| c.548-18delT     | BRCA1 | Yes                  | 6T                   | Run2     | Intron 8  |
| c.671-49delT     | BRCA1 | Yes                  | 6T                   | Run2     | Intron 10 |
| c.1016delA       | BRCA1 | Yes                  | 7A                   | Run2/3   | Exon 11   |
| c.1961delA       | BRCA1 | Yes                  | 8A                   | Run1     | Exon 11   |
| c.68-16delT      | BRCA2 | Yes                  | 10T                  | Run1/2/3 | Intron 2  |
| c.476-15delT     | BRCA2 | Yes                  | 7T                   | Run1/2/3 | Intron 5  |
| c.632-61delT     | BRCA2 | Yes                  | 6A                   | Run1/2/3 | Intron 7  |
| c.1593delA.      | BRCA2 | Yes                  | 6A                   | Run1/2   | Exon 10   |
| c.1813delA.      | BRCA2 | Yes                  | 8A                   | Run1/2/3 | Exon 10   |
| c.1909+22delTTT  | BRCA2 | Yes                  | 11T                  | Run1     | Intron10  |
| c.1909+22delTT   | BRCA2 | Yes                  | 11T                  | Run1/2/3 | Intron10  |
| c.1909+22delT    | BRCA2 | Yes                  | 11T                  | Run1/2/3 | Intron10  |
| c.2835delA       | BRCA2 | Yes                  | 6A                   | Run2     | Exon 11   |
| c.2957delA       | BRCA2 | Yes                  | 7A                   | Run2     | Exon 11   |
| c.4169delT       | BRCA2 | Yes                  | 6T                   | Run1/2/3 | Exon11    |
| c.4593delA       | BRCA2 | Yes                  | 6A                   | Run1/2/3 | Exon11    |
| c.5351delA       | BRCA2 | Yes                  | 6A                   | Run1     | Exon11    |
| c.7618-27delT    | BRCA2 | Yes                  | 6T                   | Run2/3   | Intron15  |
| c.8940delA       | BRCA2 | Yes                  | 7A                   | Run1/2/3 | Exon22    |
| c.9097delA       | BRCA2 | Yes                  | 8A                   | Run1/3   | Exon23    |
| c.9256+28delT    | BRCA2 | Yes                  | 8A                   | Run1/2/3 | Intron24  |
| c.9257-17delT    | BRCA2 | Yes                  | 8T                   | Run1/2/3 | Intron24  |
| c.9649-53delT    | BRCA2 | Yes                  | 6T                   | Run3     | Intron 26 |
| c.9945delA       | BRCA2 | Yes                  | 6A                   | Run1     | Exon27    |
